# Supplementary material
Source: MDPI journal article supplement (https://www.mdpi.com/2072-4292/4/5/1448)
Supplement: s1 [file s1]

Correction

## Lipa, B. *et al.* Tsunami Arrival Detection with High Frequency (HF) Radar. *Remote Sens.* 2012, 4, 1448–1461

Belinda Lipa <sup>1,\*</sup>, James Isaacson <sup>2</sup>, Bruce Nyden <sup>3</sup> and Donald Barrick <sup>3</sup>

<sup>1</sup> Codar Ocean Sensors, 125 La Sandra Way, Portola Valley, CA 94028, USA

<sup>2</sup> Codar Ocean Sensors, 5 Sunset Trail, Sunset Valley, TX 78745, USA;

E-Mail: [jisaac@Austin.rr.com](mailto:jisaac@Austin.rr.com)

<sup>3</sup> Codar Ocean Sensors, 1914 Plymouth St., Mountain View, CA 94043, USA;

E-Mails: [Bruce@codar.com](mailto:Bruce@codar.com) (B.N.); [Don@codar.com](mailto:Don@codar.com) (D.B.)

\* Author to whom correspondence should be addressed; E-Mail: [Belinda@lipa.name](mailto:Belinda@lipa.name);

Tel.: +1-650-851-5517; Fax: +1-408-773-0514.

Received: 1 November 2012 / Accepted: 2 November 2012 / Published: 6 November 2012

---

We neglected to state that the radar data from Tokushima and Anan is owned by the Ministry of Land, Infrastructure, Transport and Tourism, Shikoku Regional Development Bureau, Komatsushima port and airport office, Japan. Lipa *et al.* [1] describe results on tsunami detection using data measured by two radars located at Tokushima and Anan on the Kii channel. This data is owned by the Ministry of Land, Infrastructure, Transport and Tourism, Shikoku Regional Development Bureau, Komatsushima port and airport office, Japan. Locations of the radars are shown in Figure 4(a,c) [1]. Results of the data analysis are given in Section 3.1.2, plotted in Figure 6 and listed in Table 1 [1].

### Acknowledgments

We are grateful to the Ministry of Land, Infrastructure, Transport and Tourism, Shikoku Regional Development Bureau, Komatsushima port and airport office, Japan and Satoshi Fujii of University of the Ryukyus for providing radar data.

### References

1. Lipa, B.; Isaacson, J.; Nyden, B.; Barrick, D. Tsunami arrival detection with High Frequency (HF) radar. *Remote Sens.* **2012**, *4*, 1448–1461.
